# Supplementary material for: PPIC, EMP3 and CHI3L1 Are Novel Prognostic Markers for High Grade Glioma
Source: Int J Mol Sci. 2016 Oct 28;17(11):1808. doi: 10.3390/ijms17111808 (PMC5133809; doi:10.3390/ijms17111808)
Supplement: Supplementary file 1 [file ijms-17-01808-s001.xlsx]

## Sheet: GSE4412-DEPGs
Table S1 the DEPGs in two dataset
Probe Set ID	Gene Symbol	Accession Number	AVG(Long)	AVG(short)	p	long-short	regulation	2AVG(Long)	2AVG(short)	FC
207781_s_at	ZNF711	NM_021998	5.54554	4.86424	2.46395e-05	0.681301	up	46.7062	29.1261	1.60358
208464_at	GRIA4	NM_000829//NM_001077243//NM_001077244//NM_001112812//NR_046356	6.8067	6.11144	2.80473e-05	0.695255	up	111.949	69.1398	1.61917
206331_at	CALCRL	NM_001271751//NM_005795	8.53494	7.801	5.50779e-05	0.733941	up	370.913	223.015	1.66318
214487_s_at	RAP2A//RAP2B	NM_002886//NM_021033	8.50217	7.70644	0.000411494	0.795724	up	362.583	208.867	1.73595
220522_at	CRB1	NM_001193640//NM_001257965//NM_001257966//NM_012076//NM_201253//NR_047563//NR_047564	7.59232	6.92141	0.000438261	0.670905	up	192.982	121.214	1.59207
205290_s_at	BMP2	NM_001200	7.50591	6.65915	0.000566491	0.846756	up	181.762	101.066	1.79845
204563_at	SELL	NM_000655//NR_029467	7.50041	6.66386	0.00104085	0.836546	up	181.071	101.396	1.78577
214954_at	SUSD5	NM_015551	5.56408	4.80675	0.00111247	0.757337	up	47.3104	27.9882	1.69037
221310_at	FGF14	NM_004115//NM_175929	6.91849	6.32147	0.00166932	0.597028	up	120.969	79.9744	1.5126
201761_at	MTHFD2	NM_001040409//NM_006636//NR_027405	9.48519	8.64475	0.00171806	0.840437	up	716.683	400.249	1.79059
211203_s_at	CNTN1	NM_001256063//NM_001256064//NM_001843//NM_175038	9.07036	8.28184	0.00176609	0.78852	up	537.589	311.231	1.7273
207723_s_at	KLRC3	NM_002261//NM_007333	5.99737	5.26055	0.00249734	0.736821	up	63.8833	38.3338	1.6665
208937_s_at	ID1	NM_002165//NM_181353	9.44181	8.62579	0.00370185	0.816013	up	695.451	395.023	1.76053
202431_s_at	MYC	NM_002467	8.32472	7.71327	0.00494637	0.611446	up	320.62	209.859	1.52779
205991_s_at	PRRX1	NM_006902//NM_022716	7.92121	7.30736	0.00639562	0.613848	up	242.394	158.393	1.53034
206785_s_at	KLRC1//KLRC2	NM_002259//NM_002260//NM_007328//NM_213657//NM_213658	7.10883	6.11319	0.00887397	0.995646	up	138.029	69.2233	1.99397
218796_at	FERMT1	NM_017671	8.7806	8.114	0.00914547	0.666596	up	439.768	277.05	1.58732
91920_at	BCAN	NM_021948//NM_198427	10.7431	10.0475	0.00928225	0.695603	up	1713.94	1058.27	1.61956
210015_s_at	MAP2	NM_001039538//NM_002374//NM_031845//NM_031846//NM_031847	8.28133	7.68858	0.00988474	0.592757	up	311.122	206.297	1.50813
209160_at	AKR1C3	NM_001253908//NM_001253909//NM_003739	6.97749	6.28936	0.0100235	0.688135	up	126.019	78.2143	1.6112
219537_x_at	DLL3	NM_016941//NM_203486	9.07581	8.18652	0.0162486	0.889283	up	539.623	291.333	1.85226
210432_s_at	SCN3A	NM_001081676//NM_001081677//NM_006922	8.67906	7.86024	0.0202204	0.818817	up	409.88	232.364	1.76396
219230_at	TMEM100	NM_001099640//NM_018286	8.53492	7.75035	0.0205811	0.784571	up	370.91	215.322	1.72258
202085_at	TJP2	NM_001170414//NM_001170415//NM_001170416//NM_001170630//NM_004817//NM_201629	9.25495	8.65136	0.0206254	0.603591	up	610.967	402.086	1.51949
201348_at	GPX3	NM_002084	10.311	9.70798	0.0262846	0.603065	up	1270.38	836.36	1.51894
209708_at	MOXD1	NM_015529	6.54186	7.52018	1.43349e-05	-0.978315	down	93.1743	183.569	-1.97016
217733_s_at	TMSB10	NM_021103	11.4823	12.1204	2.16881e-05	-0.638185	down	2860.92	4452.65	-1.55637
201141_at	GPNMB	NM_001005340//NM_002510	7.59892	9.23622	2.81718e-05	-1.6373	down	193.866	603.087	-3.11084
209714_s_at	CDKN3	NM_001130851//NM_005192	6.4938	7.21579	3.99441e-05	-0.721994	down	90.1214	148.652	-1.64946
202950_at	CRYZ	NM_001130042//NM_001130043//NM_001134759//NM_001889	6.81352	7.47984	4.94499e-05	-0.666317	down	112.48	178.507	-1.58702
204162_at	NDC80	NM_006101	5.012	5.60118	0.000115135	-0.589176	down	32.2673	48.5425	-1.50439
202870_s_at	CDC20	NM_001255	6.34089	7.19006	0.000164128	-0.849175	down	81.0583	146.024	-1.80147
203554_x_at	PTTG1	NM_004219	8.81401	9.59719	0.000178275	-0.783181	down	450.071	774.537	-1.72092
200704_at	LITAF	NM_001136472//NM_001136473//NM_004862//NR_024320	9.08088	9.68601	0.000178649	-0.605133	down	541.524	823.722	-1.52112
202345_s_at	FABP5//LOC101060453	NM_001444//XM_003960529	7.58	9.08685	0.000230749	-1.50685	down	191.34	543.767	-2.84189
203729_at	EMP3	NM_001425	7.8461	9.15404	0.000280912	-1.30794	down	230.097	569.693	-2.47588
219196_at	SCG3	NM_001165257//NM_013243	7.65855	6.54513	0.000314556	1.11342	up	202.047	93.3855	2.16358
211564_s_at	PDLIM4	NM_001131027//NM_003687	5.71371	6.84049	0.000469777	-1.12678	down	52.4806	114.602	-2.1837
216331_at	ITGA7	NM_001144996//NM_001144997//NM_002206	8.88447	9.49992	0.000480545	-0.615453	down	472.598	724.038	-1.53204
219332_at	MICALL2	NM_024723//NM_182924	7.12754	7.78418	0.000490932	-0.656644	down	139.831	220.43	-1.57641
218876_at	TPPP3	NM_015964//NM_016140	7.5849	8.26464	0.000541662	-0.679745	down	191.991	307.542	-1.60186
203820_s_at	IGF2BP3	NM_006547	4.86101	5.65205	0.000555285	-0.791039	down	29.0609	50.2846	-1.73032
201890_at	RRM2	NM_001034//NM_001165931	6.25831	7.40347	0.000627883	-1.14515	down	76.5491	169.303	-2.2117
202668_at	EFNB2	NM_004093	8.06391	8.79433	0.000631911	-0.73042	down	267.595	443.973	-1.65912
201105_at	LGALS1	NM_002305	9.94007	10.8618	0.000708751	-0.921725	down	982.336	1860.92	-1.89438
219787_s_at	ECT2	NM_001258315//NM_001258316//NM_018098	4.85831	5.47247	0.000768481	-0.614154	down	29.0067	44.3994	-1.53066
209213_at	CBR1	NM_001757	7.98165	8.66058	0.000792877	-0.678929	down	252.765	404.664	-1.60095
201850_at	CAPG	NM_001256139//NM_001256140//NM_001747	7.24874	7.99741	0.00079429	-0.748665	down	152.086	255.54	-1.68024
212169_at	FKBP9	NM_007270	9.03625	9.62849	0.00092633	-0.592239	down	525.03	791.527	-1.50758
219306_at	KIF15	NM_020242	5.59123	6.21148	0.00101126	-0.620253	down	48.2089	74.1041	-1.53714
214710_s_at	CCNB1	NM_031966	6.23498	6.92311	0.00101569	-0.68813	down	75.3209	121.357	-1.61119
202589_at	TYMS	NM_001071	8.66361	9.523	0.00103642	-0.859393	down	405.513	735.712	-1.81427
207828_s_at	CENPF	NM_016343	7.4787	8.22929	0.00104423	-0.750587	down	178.367	300.098	-1.68248
202598_at	S100A13	NM_001024210//NM_001024211//NM_001024212//NM_001024213//NM_005979	8.65029	9.34899	0.00109406	-0.698707	down	401.787	652.12	-1.62305
200660_at	S100A11	NM_005620	7.93859	8.81932	0.00111328	-0.880732	down	245.332	451.732	-1.84131
209356_x_at	EFEMP2	NM_016938//NR_037718	7.40828	8.13169	0.00114842	-0.723412	down	169.869	280.467	-1.65108
213503_x_at	ANXA2	NM_001002857//NM_001002858//NM_001136015//NM_004039	9.62573	10.5588	0.00130606	-0.933087	down	790.01	1508.41	-1.90936
202095_s_at	BIRC5	NM_001012270//NM_001012271//NM_001168	7.05673	7.69313	0.00136913	-0.636394	down	133.134	206.949	-1.55444
218883_s_at	MLF1IP	NM_024629	6.77691	7.68379	0.00140712	-0.906882	down	109.661	205.614	-1.87499
202954_at	UBE2C	NM_007019//NM_181799//NM_181800//NM_181801//NM_181802//NM_181803	7.93143	8.54725	0.00146009	-0.615821	down	244.117	374.092	-1.53243
222150_s_at	GSAP	NM_017439	6.84396	7.55997	0.0015214	-0.716016	down	114.878	188.703	-1.64264
211959_at	IGFBP5	NM_000599	10.0862	10.9127	0.00173385	-0.826506	down	1087.07	1927.8	-1.77339
205173_x_at	CD58	NM_001144822//NM_001779//NR_026665	7.14078	7.79779	0.00196164	-0.657016	down	141.12	222.52	-1.57682
200986_at	SERPING1	NM_000062//NM_001032295	7.70826	8.59733	0.00218837	-0.889065	down	209.131	387.305	-1.85198
201860_s_at	PLAT	NM_000930//NM_000931//NM_033011	6.44307	7.29528	0.00218931	-0.852213	down	87.0074	157.072	-1.80527
202283_at	SERPINF1	NM_002615	8.18349	8.84916	0.00222891	-0.665673	down	290.72	461.172	-1.58631
209395_at	CHI3L1	NM_001276	8.68491	10.4587	0.00226309	-1.77374	down	411.545	1407.24	-3.4194
201896_s_at	PSRC1	NM_001005290//NM_001032290//NM_001032291//NM_032636	8.87309	9.50422	0.00226313	-0.631131	down	468.885	726.198	-1.54878
218039_at	NUSAP1	NM_001129897//NM_001243142//NM_001243143//NM_001243144//NM_016359//NM_018454	8.08763	9.02294	0.00230447	-0.935304	down	272.032	520.205	-1.91229
202718_at	IGFBP2	NM_000597	8.10109	9.50464	0.00232839	-1.40355	down	274.582	726.411	-2.64552
208659_at	CLIC1	NM_001288	9.18666	9.96428	0.00234996	-0.777621	down	582.719	998.956	-1.7143
213258_at	TFPI	NM_001032281//NM_006287	6.26111	7.10685	0.00239789	-0.845745	down	76.6975	137.84	-1.79719
205029_s_at	FABP7	NM_001446	7.53509	8.74236	0.00242833	-1.20727	down	185.476	428.266	-2.30901
204517_at	PPIC	NM_000943	6.25353	6.88162	0.0024578	-0.628088	down	76.2958	117.916	-1.54552
208816_x_at	ANXA2P2	NR_003573	8.73744	9.372	0.00246167	-0.634562	down	426.807	662.603	-1.55247
201666_at	TIMP1	NM_003254	9.1324	10.4252	0.00250833	-1.29282	down	561.21	1375	-2.45006
208782_at	FSTL1	NM_007085	9.31477	9.99992	0.00250943	-0.685152	down	636.831	1023.94	-1.60787
218009_s_at	PRC1	NM_001267580//NM_003981//NM_199413//NM_199414	6.95814	7.72647	0.00277877	-0.76833	down	124.339	211.787	-1.7033
209496_at	RARRES2	NM_002889	6.73052	7.46379	0.00293617	-0.73327	down	106.191	176.532	-1.6624
218355_at	KIF4A	NM_012310	6.32268	6.91934	0.00305123	-0.596659	down	80.0419	121.04	-1.51221
201664_at	SMC4	NM_001002799//NM_001002800//NM_005496	7.47287	8.24995	0.003056	-0.777079	down	177.647	304.426	-1.71366
209875_s_at	SPP1	NM_000582//NM_001040058//NM_001040060//NM_001251829//NM_001251830	10.841	11.5906	0.0032183	-0.749609	down	1834.27	3084.03	-1.68134
202580_x_at	FOXM1	NM_001243088//NM_001243089//NM_021953//NM_202002//NM_202003	6.56291	7.22906	0.0032744	-0.666151	down	94.5435	150.025	-1.58683
203303_at	DYNLT3	NM_006520	8.11898	8.8988	0.00333996	-0.779821	down	278.007	477.315	-1.71692
208949_s_at	LGALS3	NM_001177388//NM_002306//NR_003225	9.26577	10.2706	0.00354595	-1.00484	down	615.564	1235.26	-2.00672
218585_s_at	DTL	NM_016448	5.98196	6.71416	0.00389577	-0.732208	down	63.2045	104.994	-1.66118
202404_s_at	COL1A2	NM_000089	6.94353	8.26522	0.00407458	-1.3217	down	123.086	307.667	-2.4996
203213_at	CDK1	NM_001130829//NM_001170406//NM_001170407//NM_001786//NM_033379	6.29781	6.93662	0.00415214	-0.63882	down	78.6735	122.499	-1.55705
218308_at	TACC3	NM_006342	6.01877	6.608	0.00416268	-0.589226	down	64.8381	97.545	-1.50444
209191_at	TUBB6	NM_032525	7.69714	8.40611	0.00457388	-0.708964	down	207.526	339.227	-1.63463
220532_s_at	TMEM176B	NM_001101311//NM_001101312//NM_001101313//NM_001101314//NM_014020	8.13853	8.84521	0.00469244	-0.706673	down	281.801	459.909	-1.63204
205463_s_at	PDGFA	NM_002607//NM_033023	7.35492	7.95927	0.00476715	-0.604347	down	163.702	248.874	-1.52029
209129_at	TRIP6	NM_003302	8.33378	8.92687	0.00523026	-0.59309	down	322.64	486.694	-1.50847
208808_s_at	HMGB2	NM_001130688//NM_001130689//NM_002129	8.55509	9.14322	0.0053827	-0.588127	down	376.132	565.437	-1.50329
203755_at	BUB1B	NM_001211	7.22256	7.82472	0.00552992	-0.60216	down	149.351	226.713	-1.51799
217546_at	MT1M	NM_176870	7.45235	8.19746	0.00554886	-0.74511	down	175.138	293.549	-1.6761
202310_s_at	COL1A1	NM_000088	6.9471	8.40863	0.00558368	-1.46154	down	123.391	339.821	-2.75402
202376_at	SERPINA3	NM_001085	10.0128	10.9458	0.00662742	-0.932979	down	1033.15	1972.51	-1.90921
209301_at	CA2	NM_000067	8.98521	9.68615	0.00708041	-0.700943	down	506.777	823.8	-1.62557
221729_at	COL5A2	NM_000393	7.10523	7.87087	0.00734075	-0.765637	down	137.685	234.082	-1.70012
201170_s_at	BHLHE40	NM_003670	8.60907	9.19954	0.00737871	-0.590467	down	390.47	587.944	-1.50573
201291_s_at	TOP2A	NM_001067	5.8067	6.72501	0.00741049	-0.918313	down	55.9745	105.786	-1.8899
212473_s_at	MICAL2	NM_014632	7.81998	8.69711	0.00747109	-0.877133	down	225.968	415.041	-1.83672
210512_s_at	VEGFA	NM_001025366//NM_001025367//NM_001025368//NM_001025369//NM_001025370//NM_001033756//NM_001171622//NM_001171623//NM_001171624//NM_001171625//NM_001171626//NM_001171627//NM_001171628//NM_001171629//NM_001171630//NM_001204384//NM_001204385//NM_003376	8.84302	9.75564	0.00835932	-0.912627	down	459.212	864.454	-1.88247
200916_at	TAGLN2	NM_001277223//NM_001277224//NM_003564	8.88549	9.49133	0.0091841	-0.605843	down	472.932	719.74	-1.52187
203186_s_at	S100A4	NM_002961//NM_019554	6.74518	7.39444	0.00919486	-0.649255	down	107.276	168.247	-1.56836
218404_at	SNX10	NM_001199835//NM_001199837//NM_001199838//NM_013322//NR_037670	6.56545	7.18713	0.00921462	-0.621681	down	94.7103	145.728	-1.53867
221024_s_at	SLC2A10	NM_030777	6.61447	7.32481	0.00935919	-0.71034	down	97.9835	160.32	-1.63619
201505_at	LAMB1	NM_002291	5.00787	5.78949	0.00937074	-0.781615	down	32.1751	55.3107	-1.71905
201422_at	IFI30//PIK3R2	NM_005027//NM_006332//NR_073517	9.00581	9.60522	0.00949526	-0.599409	down	514.065	778.858	-1.5151
202016_at	MEST	NM_001253900//NM_001253901//NM_001253902//NM_002402//NM_177524//NM_177525	9.47802	10.0803	0.00982403	-0.60233	down	713.129	1082.65	-1.51817
202207_at	ARL4C	NM_005737	7.89647	8.53978	0.0106215	-0.643305	down	238.273	372.16	-1.5619
211980_at	COL4A1	NM_001845	8.69006	9.57536	0.0106922	-0.885296	down	413.018	762.903	-1.84714
202409_at	IGF2	NM_000612//NM_001007139//NM_001127598	6.89187	7.74932	0.0111212	-0.857451	down	118.757	215.169	-1.81183
219918_s_at	ASPM	NM_001206846//NM_018136	5.62229	6.27058	0.0116909	-0.648294	down	49.2581	77.2029	-1.56731
219148_at	PBK	NM_018492	5.339	6.07431	0.0119332	-0.735312	down	40.4762	67.383	-1.66476
202503_s_at	KIAA0101	NM_001029989//NM_014736	7.68416	8.35901	0.0119566	-0.674852	down	205.666	328.332	-1.59643
211964_at	COL4A2	NM_001846	8.94425	9.81762	0.0123027	-0.873366	down	492.593	902.397	-1.83193
215076_s_at	COL3A1	NM_000090	6.90289	8.19908	0.0123949	-1.29619	down	119.668	293.879	-2.45579
202912_at	ADM	NM_001124	7.7924	8.70663	0.0130769	-0.91423	down	221.689	417.788	-1.88456
213479_at	NPTX2	NM_002523	7.31993	8.35014	0.0139264	-1.03021	down	159.779	326.319	-2.04232
212828_at	SYNJ2	NM_001178088//NM_003898	7.21819	7.91942	0.0143497	-0.70123	down	148.899	242.093	-1.62589
204724_s_at	COL9A3	NM_001853	6.51156	7.16289	0.0164072	-0.651333	down	91.2375	143.299	-1.57062
215870_s_at	PLA2G5	NM_000929	6.23165	6.90891	0.0175217	-0.677264	down	75.1473	120.168	-1.5991
218002_s_at	CXCL14	NM_004887	7.06518	7.9044	0.0181522	-0.839218	down	133.916	239.586	-1.78908
203665_at	HMOX1	NM_002133	8.39436	8.98909	0.0225472	-0.594725	down	336.477	508.143	-1.51018
206025_s_at	TNFAIP6	NM_007115	5.75065	6.38407	0.0228023	-0.633423	down	53.8415	83.5212	-1.55124
200872_at	S100A10	NM_002966	10.4057	11.0178	0.0230402	-0.61211	down	1356.5	2073.41	-1.52849
201340_s_at	ENC1	NM_001256574//NM_001256575//NM_001256576//NM_003633//NR_046318	7.90754	8.8116	0.0233619	-0.904067	down	240.107	449.321	-1.87133
201438_at	COL6A3	NM_004369//NM_057164//NM_057165//NM_057166//NM_057167	6.70925	7.63693	0.0234126	-0.927675	down	104.637	199.042	-1.90221
204170_s_at	CKS2	NM_001827	7.16796	7.77807	0.0241057	-0.610105	down	143.804	219.499	-1.52637
209156_s_at	COL6A2	NM_001849//NM_058174//NM_058175	6.81313	7.79497	0.0246505	-0.981831	down	112.45	222.085	-1.97497
208636_at	ACTN1	NM_001102//NM_001130004//NM_001130005	8.91649	9.50192	0.0274409	-0.585431	down	483.204	725.041	-1.50049
212998_x_at	HLA-DQB1//LOC101060835	NM_001243961//NM_001243962//NM_002123//XM_003960955	6.69463	7.30624	0.0277704	-0.611606	down	103.582	158.269	-1.52796
206306_at	RYR3	NM_001036//NM_001243996	6.39731	7.03276	0.0296621	-0.63545	down	84.2914	130.94	-1.55342
217028_at	CXCR4	NM_001008540//NM_003467	7.24538	7.86719	0.0297333	-0.621811	down	151.731	233.485	-1.53881
202071_at	SDC4	NM_002999	8.14139	8.73502	0.0298914	-0.593626	down	282.359	426.09	-1.50904
201012_at	ANXA1	NM_000700	8.57069	9.45734	0.0314547	-0.886651	down	380.22	702.981	-1.84888
221898_at	PDPN	NM_001006624//NM_001006625//NM_006474//NM_198389	6.32946	7.02924	0.0346504	-0.699772	down	80.419	130.62	-1.62425
211538_s_at	HSPA2	NM_021979	9.02486	9.64844	0.0347854	-0.623572	down	520.901	802.544	-1.54068
210136_at	MBP	NM_001025081//NM_001025090//NM_001025092//NM_001025094//NM_001025098//NM_001025100//NM_001025101//NM_002385	8.19021	8.90247	0.0360581	-0.712257	down	292.078	478.531	-1.63836
203484_at	SEC61G	NM_001012456//NM_014302	9.17944	9.76449	0.0412915	-0.585046	down	579.812	869.768	-1.50009
203570_at	LOXL1	NM_005576	6.4783	7.14277	0.0434259	-0.664465	down	89.1586	141.315	-1.58498
209596_at	MXRA5	NM_015419	7.28519	7.88856	0.0438649	-0.603368	down	155.977	236.969	-1.51926
215116_s_at	DNM1	NM_001005336//NM_004408	8.96168	9.62658	0.0451655	-0.664904	down	498.579	790.478	-1.58546
204081_at	NRGN	NM_001126181//NM_006176	8.8499	9.80106	0.04595	-0.951162	down	461.408	892.1	-1.93343
205591_at	OLFM1	NM_006334//NM_014279//NM_058199	8.62006	9.44657	0.0459701	-0.826511	down	393.457	697.753	-1.77339
201744_s_at	LUM	NM_002345	4.86716	5.61376	0.0471727	-0.746602	down	29.1851	48.9677	-1.67784
203936_s_at	MMP9	NM_004994	6.85425	7.45907	0.0472525	-0.604822	down	115.7	175.956	-1.52079
211597_s_at	HOPX	NM_001145459//NM_001145460//NM_032495//NM_139211//NM_139212	9.34774	9.96648	0.0477988	-0.61873	down	651.556	1000.48	-1.53552
203645_s_at	CD163	NM_004244//NM_203416	8.49891	9.30399	0.0488613	-0.805076	down	361.765	632.09	-1.74724

## Sheet: GSE7696-DEPGs
Table S1 the DEPGs in two dataset
Probe Set ID	Gene Symbol	Accession Number	AVG(Long)	AVG(short)	p	long-short	regulation	2AVG(Long)	2AVG(short)	FC
207850_at	CXCL3	NM_002090	6.11772	5.42864	0.00417338	0.689079	up	69.4411	43.0708	1.61225
213325_at	PVRL3	NM_001243286//NM_001243288//NM_015480	6.24823	5.62134	0.00807879	0.626893	up	76.0161	49.2257	1.54424
223854_at	PCDHB10//PCDHB9	NM_018930//NM_019119	8.68	7.99219	0.00859209	0.68781	up	410.148	254.618	1.61084
205848_at	GAS2	NM_001143830//NM_005256//NM_177553	5.15475	4.41273	0.0188692	0.742015	up	35.6232	21.2993	1.67251
235874_at	PRSS35	NM_001170423//NM_153362	5.53251	4.66148	0.0243706	0.871023	up	46.2861	25.3073	1.82896
206932_at	CH25H	NM_003956	7.85187	7.08498	0.029474	0.766885	up	231.019	135.766	1.70159
206858_s_at	HOXC6	NM_004503//NM_153693	7.85918	7.11652	0.0456914	0.742659	up	232.192	138.767	1.67326
208937_s_at	ID1	NM_002165//NM_181353	8.57971	7.93451	0.0511634	0.645203	up	382.604	244.638	1.56396
210751_s_at	RGN	NM_004683//NM_152869	7.98528	8.75218	0.000357739	-0.766901	down	253.402	431.191	-1.70161
220945_x_at	MANSC1	NM_018050	6.98986	7.61822	0.000545548	-0.62836	down	127.103	196.477	-1.54581
209047_at	AQP1	NM_000385//NM_001185060//NM_001185061//NM_001185062//NM_198098	9.33235	10.5804	0.00136763	-1.24809	down	644.638	1531.19	-2.37527
228425_at	LOC654433	NR_015377//NR_047570	6.25438	7.21121	0.00182279	-0.956837	down	76.3405	148.181	-1.94105
202421_at	IGSF3	NM_001007237//NM_001542	8.06845	8.79314	0.00187503	-0.724694	down	268.438	443.607	-1.65255
227834_at	TXLNB	NM_153235	4.28678	4.91528	0.00276623	-0.628493	down	19.5187	30.1749	-1.54595
227417_at	42431	NM_017898	6.71052	7.60406	0.00371083	-0.893546	down	104.729	194.559	-1.85774
219564_at	KCNJ16	NM_001270422//NM_018658//NM_170741//NM_170742	7.05452	8.4396	0.00398664	-1.38508	down	132.93	347.195	-2.61186
209395_at	CHI3L1	NM_001276	10.0142	11.9134	0.00400685	-1.89924	down	1034.13	3857.46	-3.73017
213761_at	MDM1	NM_001205028//NM_001205029//NM_017440//NM_020128	7.04769	7.82097	0.004716	-0.773276	down	132.302	226.124	-1.70915
202704_at	TOB1	NM_001243877//NM_001243885//NM_005749	8.13359	8.74147	0.00567997	-0.607871	down	280.838	428	-1.52401
238983_at	NSUN7	NM_024677	5.14968	5.78103	0.00817869	-0.631358	down	35.4983	54.9876	-1.54902
204517_at	PPIC	NM_000943	8.44644	9.10335	0.00853281	-0.656907	down	348.845	550.023	-1.5767
209921_at	SLC7A11	NM_014331	9.09237	9.73421	0.00888325	-0.641831	down	545.855	851.702	-1.56031
205328_at	CLDN10	NM_001160100//NM_006984//NM_182848	7.01044	7.60578	0.00890245	-0.595339	down	128.93	194.791	-1.51083
223734_at	MGARP	NM_032623	6.26656	6.89236	0.00911431	-0.625791	down	76.9882	118.797	-1.54306
1558189_a_at	LOC284570	---	7.65231	8.57636	0.00931871	-0.92405	down	201.176	381.718	-1.89743
213388_at	LOC100996724//LOC100996761//LOC101060291//LOC101060344//LOC101060353//LOC101060463//LOC101060582//LOC728802//PDE4DIP	NM_001002810//NM_001002811//NM_001002812//NM_001195260//NM_001195261//NM_001198832//NM_001198834//NM_014644//NM_022359//XM_001713923//XM_003846489//XM_003846520//XM_003846521//XM_003846522//XM_003846735//XM_003846757//XM_003846758//XM_003960065//XM_003960066//XM_003960067//XM_003960184//XM_003960185//XM_003960239//XM_003960240//XM_003960241//XM_003960242//XM_003960243//XM_003960244//XM_003960245/…	8.90184	9.57298	0.00943725	-0.671144	down	478.321	761.648	-1.59234
203423_at	RBP1	NM_001130992//NM_001130993//NM_002899	7.95818	8.79832	0.00978339	-0.840144	down	248.685	445.203	-1.79023
203397_s_at	GALNT3	NM_004482	5.59902	6.31545	0.00979602	-0.716431	down	48.4699	79.6414	-1.64311
224829_at	CPEB4	NM_030627	8.22456	8.88944	0.0102857	-0.664881	down	299.116	474.229	-1.58544
229435_at	GLIS3	NM_001042413//NM_152629	7.56392	8.30389	0.010918	-0.739976	down	189.219	316.024	-1.67015
218966_at	MYO5C	NM_018728	8.27594	8.91201	0.0109976	-0.636069	down	309.961	481.706	-1.55409
227188_at	EVA1C	NM_058187	7.42036	8.16415	0.0114743	-0.743789	down	171.297	286.849	-1.67457
228338_at	C11orf93	NM_001136105//NM_001271457//NM_001271458	6.26672	6.86095	0.0119301	-0.594228	down	76.9964	116.239	-1.50966
204865_at	CA3	NM_005181	4.91531	6.0695	0.0131942	-1.15419	down	30.1756	67.1588	-2.2256
205208_at	ALDH1L1	NM_001270364//NM_001270365//NM_012190//NR_072979	8.18064	8.81235	0.0135039	-0.631711	down	290.146	449.553	-1.5494
200621_at	CSRP1	NM_001144773//NM_001193570//NM_001193571//NM_001193572//NM_004078	9.51115	10.2482	0.0135043	-0.737088	down	729.696	1216.26	-1.66681
224823_at	MYLK	NM_005965//NM_053025//NM_053026//NM_053027//NM_053028//NM_053029//NM_053030//NM_053031//NM_053032	8.52759	9.39995	0.0141918	-0.872359	down	369.028	675.563	-1.83065
213395_at	MLC1	NM_015166//NM_139202	7.86364	8.45728	0.0144522	-0.593635	down	232.913	351.475	-1.50904
215695_s_at	GYG2	NM_001079855//NM_001184702//NM_001184703//NM_001184704//NM_003918	7.65405	8.34224	0.0160296	-0.68819	down	201.418	324.537	-1.61126
204041_at	MAOB	NM_000898	10.2342	10.949	0.0174926	-0.714753	down	1204.49	1976.82	-1.6412
205741_s_at	DTNA	NM_001128175//NM_001198938//NM_001198939//NM_001198940//NM_001198941//NM_001198942//NM_001198943//NM_001198944//NM_001198945//NM_001390//NM_001391//NM_001392//NM_032975//NM_032978//NM_032979//NM_032980//NM_032981	9.38869	9.98748	0.0180855	-0.598792	down	670.314	1015.16	-1.51445
228600_x_at	FAM221A	NM_001127364//NM_001127365//NM_199136	7.62	8.2112	0.0182391	-0.5912	down	196.719	296.358	-1.5065
203413_at	NELL2	NM_001145107//NM_001145108//NM_001145109//NM_001145110//NM_006159	9.48284	10.1609	0.0203041	-0.678078	down	715.516	1144.83	-1.60001
226069_at	PRICKLE1	NM_001144881//NM_001144882//NM_001144883//NM_153026	5.39504	5.9849	0.0216017	-0.589864	down	42.0793	63.3338	-1.50511
239921_at	COL28A1	NM_001037763	5.9062	6.73445	0.0224558	-0.82825	down	59.9714	106.481	-1.77553
202834_at	AGT	NM_000029	10.1959	10.7873	0.0227495	-0.591471	down	1172.89	1767.29	-1.50678
223642_at	ZIC2	NM_007129	7.52844	8.24565	0.0232146	-0.717203	down	184.624	303.52	-1.64399
205048_s_at	PSPH	NM_004577	5.37336	6.58193	0.0250973	-1.20857	down	41.4518	95.7987	-2.31108
226809_at	LOC100216479//LOC100996884	NR_046258//NR_046259//NR_046260//XR_159393	6.3944	7.15581	0.025254	-0.761414	down	84.1211	142.598	-1.69515
235940_at	C9orf64	NM_032307	7.26366	7.8576	0.027572	-0.593944	down	153.667	231.939	-1.50937
236029_at	FAT3	NM_001008781	8.94916	9.55286	0.0291741	-0.603696	down	494.272	751.098	-1.5196
223551_at	PKIB	NM_001270393//NM_001270394//NM_001270395//NM_032471//NM_181794//NM_181795	5.8337	6.67464	0.0339638	-0.840937	down	57.032	102.156	-1.79121
212314_at	SEL1L3	NM_015187	8.44301	9.09271	0.0349664	-0.649703	down	348.016	545.983	-1.56885
221605_s_at	PIPOX	NM_016518	8.85409	9.49506	0.0357566	-0.640969	down	462.75	721.601	-1.55938
236918_s_at	LRRC34	NM_001172779//NM_001172780//NM_153353	6.06465	6.68222	0.0362756	-0.617564	down	66.9333	102.695	-1.53428
214087_s_at	MYBPC1	NM_001254718//NM_001254719//NM_001254720//NM_001254721//NM_001254722//NM_001254723//NM_002465//NM_206819//NM_206820//NM_206821	6.98194	7.57966	0.0393274	-0.597718	down	126.407	191.295	-1.51332
229222_at	ACSS3	NM_024560	6.979	7.87895	0.0403588	-0.899955	down	126.15	235.397	-1.86601
236028_at	IBSP	NM_004967	7.42181	6.14537	0.045696	1.27644	up	171.47	70.785	2.42241
203729_at	EMP3	NM_001425	8.75847	9.44294	0.0459529	-0.684478	down	433.073	696	-1.60712
206172_at	IL13RA2	NM_000640	7.40018	8.39894	0.0467744	-0.998761	down	168.918	337.545	-1.99828
204304_s_at	PROM1	NM_001145847//NM_001145848//NM_001145849//NM_001145850//NM_001145851//NM_001145852//NM_006017	6.30796	7.01288	0.0468504	-0.704916	down	79.2294	129.148	-1.63005
207480_s_at	MEIS2	NM_001220482//NM_002399//NM_020149//NM_170674//NM_170675//NM_170676//NM_170677//NM_172315//NM_172316//NR_051953	8.83116	9.44752	0.0483101	-0.616365	down	455.453	698.214	-1.53301
203962_s_at	NEBL	NM_001173484//NM_006393//NM_016365//NM_213569	7.54114	8.15795	0.0484094	-0.616814	down	186.256	285.62	-1.53349
